# Supplementary material for: Individual and Combined Effects of Engineered Peptides and Antibiotics on Pseudomonas aeruginosa Biofilms
Source: MDPI journal article supplement (doi:10.3390/ph10030058), 2017-06-25
Supplement: s1 [file s1]

# Supplementary Materials: Individual and Combined Effects of Engineered Peptides and Antibiotics on the *Pseudomonas aeruginosa* Biofilms

Biswajit Mishra and Guangshun Wang

**Table S1.** Antimicrobial activities of the selected peptides against various pathogens.

| Peptides | MIC ( $\mu\text{M}$ ) |            |            |             |            |
|----------|-----------------------|------------|------------|-------------|------------|
|          | PA                    | EC         | KP         | AB          | SA         |
| LL-37    | > 50                  | 3.1-6.25   | 6.25       | 3.1         | > 50       |
| GF-17    | 25                    | 6.25       | 3.1        | 3.1         | 3.1        |
| 17BIPHE2 | 6.25                  | 3.1        | 3.1        | 3.1         | 3.1        |
| DASamP2  | 3.1                   | $\leq 3.1$ | $\leq 3.1$ | $\leq 1.56$ | $\leq 3.1$ |

PA: *Pseudomonas aeruginosa* PAO1; EC: *Escherichia coli* ATCC 25922; KP: *Klebsiella pneumoniae*; AC: *Acinetobacter baumannii*; SA: *Staphylococcus aureus* USA300.

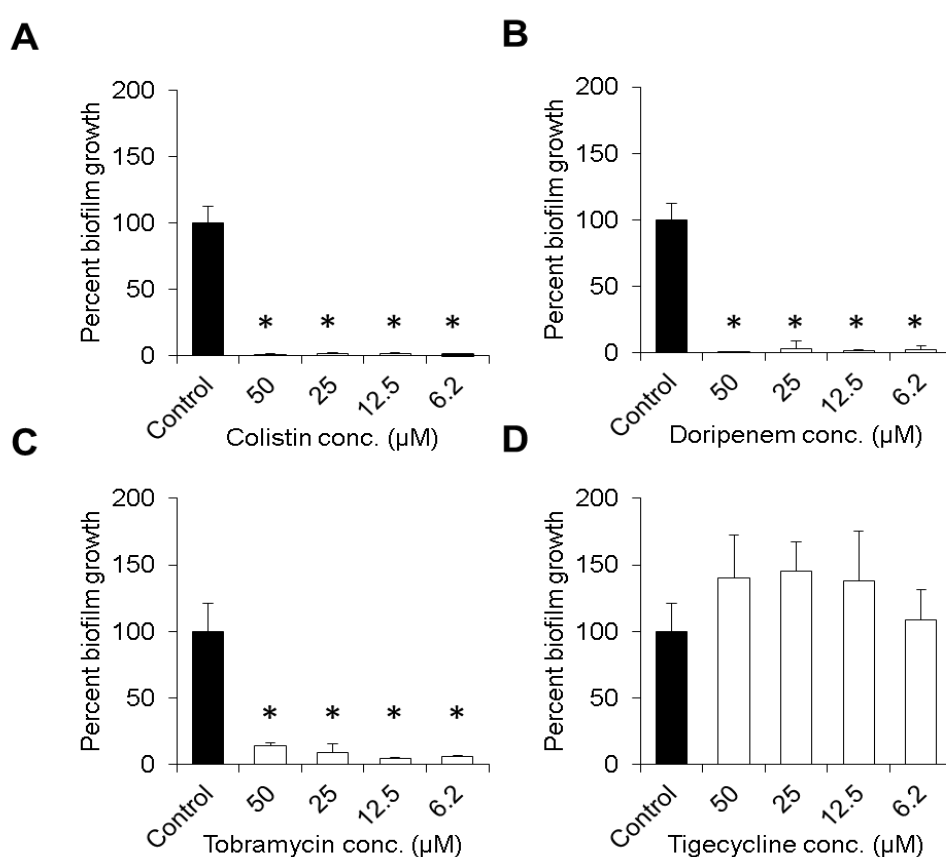

**Figure S1.** Inhibition of the biofilms formation of *P. aeruginosa* PAO1 ( $10^8$  CFU/mL) by colistin (A), doripenem (B), tobramycin (C) and tigecycline (D). This figure indicates that, except for tigecycline, colistin, doripenem, and tobramycin could inhibit the biofilm formation of *P. aeruginosa* PAO1 on the polystyrene surfaces in the concentration range of 6.2–50  $\mu\text{M}$ . *p* values were calculated based on paired Student's *t*-test with two tailed distribution and values  $<0.05$  were considered significant (\*).

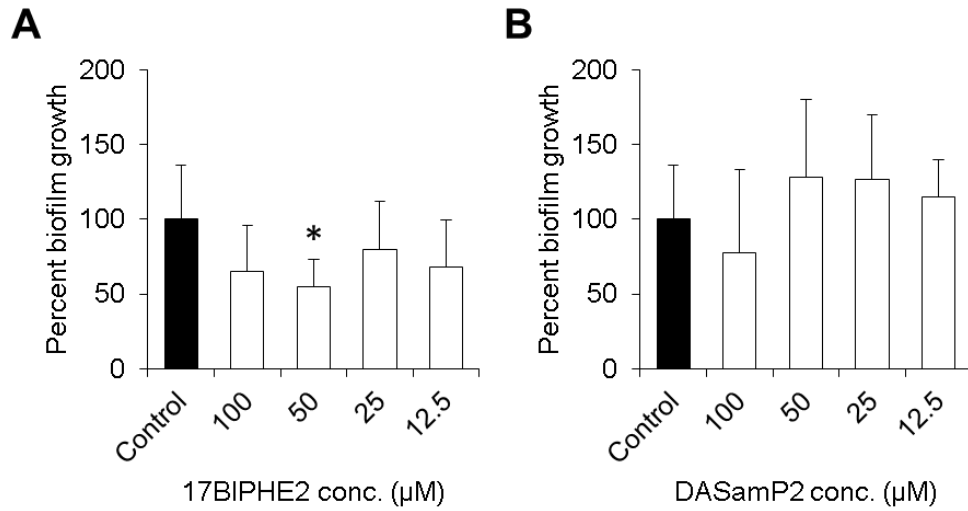

**Figure S2.** Disruption of the 24 h preformed biofilms of *P. aeruginosa* PAO1 by 17BIPHE2 (**A**) and DASamP2 (**B**) at 12.5–100  $\mu\text{M}$ . While 17BIPHE2 disrupted biofilms by 50–70% in this concentration range, DASamP2 only disrupted ~20% of the *P. aeruginosa* biofilms at 100  $\mu\text{M}$ . It appeared that 17BIPHE2 was slightly more potent than DASamP2 when used alone. *p* values were calculated based on paired Student's *t*-test with two tailed distribution and values <0.05 were considered significant (\*).
